# Supplementary material
Source: publisher site journal article supplement (https://www.dovepress.com/get_supplementary_file.php?f=463946.docx)
Supplement: Supplementary file 1 [file get_supplementary_file.php]

| **Table S1.** Analysis of the risk of bias of the included studies according to the Joanna Briggs Institute (JBI) critical appraisal tool for cases series1. | | | | | | | | | | |
| --- | --- | --- | --- | --- | --- | --- | --- | --- | --- | --- |
|  | **Q1** | **Q2** | **Q3** | **Q4** | **Q5** | **Q6** | **Q7** | **Q8** | **Q9** | **Q10** |
| **Broccoli 2018**2 | N | Y | U | Y | Y | Y | Y | Y | Y | Y |
| **Yi 2021**3 | Y | Y | U | Y | U | Y | Y | Y | Y | Y |
| **McCulloch 2021**4 | Y | Y | U | Y | Y | Y | Y | Y | Y | Y |
| **Tucker 2021**5 | Y | Y | U | Y | U | Y | N | Y | Y | Y |
| **Jeon 2019**6 | Y | Y | Y | Y | U | Y | Y | Y | Y | Y |
| **Epperla 2017**7 | Y | U | U | Y | U | Y | Y | Y | Y | U |
| **Visco 2021**8 | Y | U | Y | Y | U | Y | Y | Y | Y | U |
| **Sancho 2022**9 | Y | Y | U | Y | U | Y | Y | Y | Y | Y |
| **Sharman 2021**10 | Y | U | U | Y | U | Y | N | Y | Y | U |
| **Cencini 2021**11 | Y | Y | Y | Y | U | Y | Y | Y | Y | Y |
| **Janssens 2021**12 | Y | U | U | U | U | Y | N | Y | Y | U |
| **Obr 2021**13 | N | U | U | Y | U | N | N | Y | Y | U |
| **Zhang 2022**14 | Y | U | Y | Y | U | Y | Y | Y | Y | U |
| **Fabbri 2020**15 | U | Y | U | U | U | Y | Y | Y | Y | Y |
| **Rigacci 2012**16 | Y | Y | Y | Y | U | U | N | Y | Y | Y |
| **Warsch 2012**17 | Y | Y | Y | U | U | U | U | Y | Y | Y |
| **García-Noblejas 2014**18 | Y | Y | U | Y | U | Y | Y | Y | Y | Y |
| **McCulloch 2020**19 | Y | Y | U | U | U | Y | Y | Y | Y | Y |
| **Karadurmus 2019**20 | Y | U | U | Y | Y | Y | N | Y | Y | U |
| **Smith 2018**21 | Y | U | Y | Y | Y | U | U | Y | Y | Y |
| **Kroschinsky 2019**22 | U | U | U | Y | U | U | N | Y | Y | U |
| **Lamm 2013**23 | Y | U | Y | Y | Y | Y | N | Y | Y | U |
| **Skarbnik 2017**24 | Y | U | U | Y | U | Y | N | Y | Y | Y |
| **Stefoni 2018**25 | Y | Y | U | Y | U | Y | N | Y | Y | Y |
| **Zinzani 2015**26 | Y | Y | U | Y | U | U | N | Y | Y | Y |
| **Hughes 2019**27 | Y | Y | Y | Y | Y | U | U | Y | Y | Y |
| **Iacoboni 2022**28 | Y | Y | U | Y | Y | Y | Y | Y | Y | Y |
| **Romancik 2021**29 | Y | U | U | Y | U | Y | Y | Y | Y | U |
| **Herbaux 2021**30 | Y | U | U | Y | Y | Y | N | Y | Y | U |
| **Wang 2021**31 | Y | U | U | U | U | Y | Y | Y | Y | U |
| **Q1.** Were there clear criteria for inclusion in the case series? **Q2.** Was the condition measured in a standard, reliable way for all participants included in the case series? **Q3.** Were valid methods used for identification of the condition for all participants included in the case series? **Q4.** Did the case series have consecutive inclusion of participants? **Q5.** Did the case series have complete inclusion of participants? **Q6.** Was there clear reporting of the demographics of the participants in the study? **Q7.** Was there clear reporting of clinical information of the participants? **Q8.** Were the outcomes or follow up results of cases clearly reported? **Q9.** Was there clear reporting of the presenting site(s)/clinic(s) demographic information? **Q10.** Was statistical analysis appropriate?  Y, yes; N, no; U, unclear. | | | | | | | | | | |
|  | | | | | | | | | | |

**References**

1. Munn Z, Barker TH, Moola S, et al. Methodological quality of case series studies: An introduction to the JBI critical appraisal tool. *JBI Evid Synth*. 2020;18(10):2127-2133.

2. Broccoli A, Casadei B, Morigi A, et al. Italian real life experience with ibrutinib: results of a large observational study on 77 relapsed/refractory mantle cell lymphoma. *Oncotarget*. 2018;9(34):23443-23450. doi:10.18632/ONCOTARGET.25215

3. Yi JH, Kim SJ, Yoon DH, et al. Real‐world outcomes of ibrutinib therapy in Korean patients with relapsed or refractory mantle cell lymphoma: a multicenter, retrospective analysis. *Cancer Commun*. 2021;41(3):275. doi:10.1002/CAC2.12150

4. McCulloch R, Lewis D, Crosbie N, et al. Ibrutinib for mantle cell lymphoma at first relapse: a United Kingdom real-world analysis of outcomes in 211 patients. *Br J Haematol*. 2021;193(2):290-298. doi:10.1111/BJH.17363

5. Tucker D, Morley N, MacLean P, et al. The 5-year follow-up of a real-world observational study of patients in the United Kingdom and Ireland receiving ibrutinib for relapsed/refractory mantle cell lymphoma. *Br J Haematol*. 2021;192(6):1035-1038. doi:10.1111/BJH.16739

6. Jeon YW, Yoon S, Min GJ, et al. Clinical outcomes for ibrutinib in relapsed or refractory mantle cell lymphoma in real-world experience. *Cancer Med*. 2019;8(16):6860-6870. doi:10.1002/CAM4.2565

7. Epperla N, Hamadani M, Cashen AF, et al. Predictive factors and outcomes for ibrutinib therapy in relapsed/refractory mantle cell lymphoma-a “real world” study. *Hematol Oncol*. 2017;35(4):528-535. doi:10.1002/HON.2380

8. Visco C, Di Rocco A, Evangelista A, et al. Outcomes in first relapsed-refractory younger patients with mantle cell lymphoma: results from the MANTLE-FIRST study. *Leukemia*. 2021;35(3):787-795. doi:10.1038/S41375-020-01013-3

9. Sancho JM, Marín A, Fernández S, et al. IBRORS-MCL Study: A Spanish Retrospective and Observational Study of Relapsed/Refractory Mantle-Cell Lymphoma (MCL) Treated with Ibrutinib in Routine Clinical Practice. *Int J Hematol*. 2022;116(3):381-392.

10. Sharman J, Kabadi SM, Clark J, Andorsky D. Treatment patterns and outcomes among mantle cell lymphoma patients treated with ibrutinib in the United States: a retrospective electronic medical record database and chart review study. *Br J Haematol*. 2021;192(4):737-746. doi:10.1111/BJH.16922

11. Cencini E, Mecacci B, Morelli F, et al. Ibrutinib in patients with relapsed/refractory mantle cell lymphoma: a real-life, retrospective, multicenter trial on behalf of the “RTL” (regional Tuscan lymphoma network). *Am J Blood Res*. 2021;11(4):373.

12. Janssens A, Snauwaert S, Bron D, et al. Effectiveness and safety of ibrutinib in chronic lymphocytic leukemia (CLL) and mantle cell lymphoma (MCL) in Belgian routine clinical practice with a 3-year follow-up. In: *EHA Library*. ; 2021:325414; EP654.

13. Obr A, Klener P, Janíková A, et al. Ibrutinib in Mantle Cell Lymphoma Patients: Analysis of the Czech Lymphoma Study Group. *Blood*. 2021;138(Supplement 1):4526-4526. doi:10.1182/BLOOD-2021-146589

14. Zhang Y, Liu P, Cai J, et al. Ibrutinib as monotherapy versus combination therapy in Chinese patients with relapsed/refractory mantle cell lymphoma: A multicenter study. *Cancer Med*. 2022;11(22):4134-4145.

15. Fabbri A, Cencini E, Congiu AG, Miglino M, Rigacci L, Bocchia M. Ibrutinib in association with venetoclax for the treatment of mantle-cell lymphoma: a multicenter case series. *Am J Blood Res*. 2020;10(6):355.

16. Rigacci L, Puccini B, Cortelazzo S, et al. Bendamustine with or without rituximab for the treatment of heavily pretreated non-Hodgkin’s lymphoma patients: A multicenter retrospective study on behalf of the Italian Lymphoma Foundation (FIL). *Ann Hematol*. 2012;91(7):1013-1022. doi:10.1007/S00277-012-1422-5

17. Warsch S, Hosein PJ, Maeda LS, Alizadeh AA, Lossos IS. A retrospective study evaluating the efficacy and safety of bendamustine in the treatment of mantle cell lymphoma. *Leuk Lymphoma*. 2012;53(7):1299-1305. doi:10.3109/10428194.2011.649476

18. García-Noblejas A, Martínez Chamorro C, Navarro Matilla B, et al. Bendamustine as salvage treatment for patients with relapsed or refractory mantle cell lymphoma patients: a retrospective study of the Spanish experience. *Ann Hematol*. 2014;93(9):1551-1558. doi:10.1007/S00277-014-2077-1

19. McCulloch R, Visco C, Eyre TA, et al. Efficacy of R-BAC in relapsed, refractory mantle cell lymphoma post BTK inhibitor therapy. *Br J Haematol*. 2020;189(4):684-688. doi:10.1111/BJH.16416

20. Karadurmus N, Paydas S, Esin E, et al. Effectiveness of bendamustine in relapsed or refractory lymphoma cases: a Turkish Oncology Group study. *Arch Med Sci*. 2019;17(4):920-927. doi:10.5114/AOMS.2019.83000

21. Smith A, Roman E, Appleton S, et al. Impact of novel therapies for mantle cell lymphoma in the real world setting: a report from the UK’s Haematological Malignancy Research Network (HMRN). *Br J Haematol*. 2018;181(2):215-228. doi:10.1111/BJH.15170

22. Kroschinsky F, Röllig D, Riemer B, et al. Modified DHAP regimen in the salvage treatment of refractory or relapsed lymphomas. *J Cancer Res Clin Oncol*. 2019;145(12):3067-3073. doi:10.1007/S00432-019-03027-6

23. Lamm W, Drach J, Kiesewetter B, et al. Rituximab, Ara-C, dexamethasone and oxaliplatin (R-ADOx) is effective for treatment of elderly patients with relapsed mantle cell lymphoma. *J Cancer Res Clin Oncol*. 2013;139(10):1771-1775. doi:10.1007/S00432-013-1475-4

24. Skarbnik AP, Ma E, Lafeuille MH, et al. Treatment patterns and outcomes with subcutaneous bortezomib in patients with relapsed mantle cell lymphoma: a retrospective, observational study of patient medical records from US community oncology practices. *Leuk Lymphoma*. 2017;58(8):1968-1972. doi:10.1080/10428194.2016.1272688

25. Stefoni V, Pellegrini C, Broccoli A, et al. Lenalidomide in Pretreated Mantle Cell Lymphoma Patients: An Italian Observational Multicenter Retrospective Study in Daily Clinical Practice (the Lenamant Study). *Oncologist*. 2018;23(9):1033-1038. doi:10.1634/THEONCOLOGIST.2017-0597

26. Zinzani PL, Rigacci L, Cox MC, et al. Lenalidomide monotherapy in heavily pretreated patients with non-Hodgkin lymphoma: an Italian observational multicenter retrospective study in daily clinical practice. *Leuk Lymphoma*. 2015;56(6):1671-1676. doi:10.3109/10428194.2014.964702

27. Hughes ME, Landsburg DJ, Rubin DJ, et al. Treatment of Patients With Relapsed/Refractory Non-Hodgkin Lymphoma With Venetoclax: A Single-Center Evaluation of Off-Label Use. *Clin Lymphoma Myeloma Leuk*. 2019;19(12):791-798. doi:10.1016/J.CLML.2019.09.612

28. Iacoboni G, Rejeski K, Villacampa G, et al. Real-world evidence of brexucabtagene autoleucel for the treatment of relapsed or refractory mantle cell lymphoma. *Blood Adv*. 2022;6(12):3606-3610. doi:10.1182/BLOODADVANCES.2021006922

29. Romancik JT, Goyal S, Gerson JN, et al. Analysis of Outcomes and Predictors of Response in Patients with Relapsed Mantle Cell Lymphoma Treated with Brexucabtagene Autoleucel. *Blood*. 2021;138(Supplement 1):1756-1756. doi:10.1182/BLOOD-2021-153277

30. Herbaux C, Bret C, Di Blasi R, et al. Kte-X19 in Relapsed or Refractory Mantle-Cell Lymphoma, a Real-Life Study from the Descar-T Registry and Lysa Group. *Blood*. 2021;138(Supplement 1):743-743. doi:10.1182/BLOOD-2021-148626

31. Wang Y, Jain P, Locke FL, et al. Brexucabtagene Autoleucel for Relapsed/Refractory Mantle Cell Lymphoma: Real World Experience from the US Lymphoma CAR T Consortium. *Blood*. 2021;138(Supplement 1):744-744. doi:10.1182/BLOOD-2021-147563
